# Supplementary material
Source: publisher site journal article supplement (https://www.dovepress.com/article/397647)
Supplement: Supplementary file 1 [file get_supplementary_file.php]

# **SUPPLEMENTARY FILES**

**Generating attributes**

Participants were asked to think about which attributes they find important to discuss with their healthcare provider when a treatment decision needs to be made.

**Share attributes**

All generated attributes from the participants were shared within the group.

**Voting on attributes**

Participants individually made a top 10 of the most important attributes

**Discussing attributes**

A discussion was held about the meaning of each attribute

**Add attributes**

Researchers provided additional attributes derived from ICHOM Standard set, systematic literature review and (if applicable) previous small group interviews

**Figure S1. The five-step nominal group technique applied during the small-group interviews.**

## **Doc. S1 SBSQ-D questions**

1. How often do you have someone help you read materials from your general practitioner, the hospital or other healthcare institutions?

| *Never* | *Occasionally* | *Sometimes* | *Often* | *Always* | *Not applicable* |
| --- | --- | --- | --- | --- | --- |
| ❑ | ❑ | ❑ | ❑ | ❑ | ❑ |

1. How confident are you filling out medical forms by yourself?

| *Never* | *Occasionally* | *Sometimes* | *Often* | *Always* | *Not applicable* |
| --- | --- | --- | --- | --- | --- |
| ❑ | ❑ | ❑ | ❑ | ❑ | ❑ |

1. How often do you have problems learning about your medical condition because of difficulty understanding written information?

| *Never* | *Occasionally* | *Sometimes* | *Often* | *Always* | *Not applicable* |
| --- | --- | --- | --- | --- | --- |
| ❑ | ❑ | ❑ | ❑ | ❑ | ❑ |

## **Doc. S2 Detailed description of the analysis**

Descriptive statistics were reported to present characteristics of the individuals with self, reported Type 2 diabetes who completed the best, worst scaling (BWS) survey. Responses for the SBSQ, D were scored on a 5-point Likert scale from 0 to 4. Per respondent, the points were added and averaged. An average score of ≤ 2 indicates inadequate health literacy and a score of >2 indicates adequate health literacy.1 Cronbach’s alpha was calculated to determine internal consistency. An alpha value between 0.70 and 0.90 indicates acceptable or good internal consistency.2 Descriptive statistics were performed in Rstudio version 1.4.1106.3

Subgroup analyses were performed to explore whether individual’s demographic and disease characteristics influence their attribute preferences. . The analyses were conducted based on sex (men and women), age (18-60 years, 60-75 years and >75 years), body mass index (BMI) (underweight, healthy weight, overweight and obese), education (low education, middle education and high education), medication (metformin without sulfonylurea, metformin with sulfonylurea and insulin), duration of diabetes (0-5 years, 6-10 years, 11-20 years and >20 years) and HbA1c value (<53 mmol/mol (<7.0%), 53-64 mmol/mol (7.0-8.0%), >64 mmol/mol (>8.0%) and do not know). Following the guidelines of The Netherlands Nutrition Centre, individuals were classified as underweight, healthy weight, overweight or obese based on their BMI and age.4 High education includes pre, university and university, low education is everything up and until lower vocational education, and middle education includes everything in-between. The RIS per subgroup was calculated for each attribute with its 95% confidence interval. No overlap in the 95% CI indicates a difference in attribute preferences between the groups.5 Subgroup analyses were performed in Rstudio version 1.4.1106.3

Latent class analysis was conducted with the survey data to identify hidden heterogeneity.6 The number of classes was determined by comparing various model fit and diagnostic indicators for each model. Model fit indicators include Akaike’s information criterion (AIC) and Bayesian Information Criterion (BIC). Diagnostic indicators include Vuong, Lo, Mendell, Rubin adjusted likelihood ratio (VLMR-LRT), entropy and the relative class size. The model with the best fit has the lowest values for AIC and BIC. Non-significant p-values for VLMR-LRT test suggest that the k class model is sufficient and that k+1 class model is not needed. The entropy score is an indication of classification certainty, where a score of at least 0.8 is necessary to have adequate entropy. A model with classes including at least 10% of the total population is considered substantial.7 Latent class analysis was performed in Mplus software (version 8.6).8

**Table S1. Identified attributes and their descriptions derived from the small group interviews**

| **Attribute** | **Description** |
| --- | --- |
| Medication withdrawal | To withdraw the current medication the individual is taking |
| Short-term adverse medication event | The short-term unwanted or unintended effects of medication. Examples of these side effects are: nausea, gastrointestinal problems, palpitations, hair loss and low blood sugars (hypos) |
| Long-term diabetes complications | The long-term unwanted or unintended effects of diabetes. Examples of complications include foot ulcers, kidney and eye problems, and cardiovascular disease. |
| Interaction with other medication | The interaction of the glucose, lowering medication with any other medication the individual is taking that influences the effect of the glucose, lowering drugs or causes additional side effects. |
| Method of administering medication | The administration form in which the drug is taken. This can be, for example oral, injection or insulin pump. |
|  |  |
| Frequency of medication intake | How often the individual has to take the medication per day. |
| Lifestyle | The individual's way of living (for example, food, exercise and sleep). |
| Clinical outcomes | The clinical effect of the medication on the individual’s body. For example, changes in blood sugar, HbA1c value, blood pressure and weight. |
| Personal treatment control | The control the individual has over the treatment by, for example, measuring blood sugar levels. |
| Out-of-pocket costs | The costs which are not reimbursed by the health insurance and must be paid by the individual. |
| Manufacturer of medication | The company that makes the drug. |
| Physical habituation to medication | The process by which the individual body gets used to the medication. |
| Experiences of other individuals | Experience of other individuals with Type 2 diabetes regarding their medication. |
| Quality of life | The extent to which the treatment affects the individual’s daily functioning (for example, eating, sleeping, seeing and stress). |
| Social support | Receiving support from friends, family and/or acquaintances when the individual needs help. |
| Need for new medication | The reason the individual should opt for a new treatment. |
| Alternatives to medication | There are treatment options besides taking medication, for example adjusting lifestyle. |
| Home situation | The individual’s situation at home, such as the composition of the household. |
| Social environment | Factors that influence the individual’s life, such as religion, living environment and income. |
| Mental health | The individual’s mental well-being. |
| Perseverance | The individual’s ability to achieve a particular goal. |

**Table S2. Ranking and mean importance score (MIS) of the attributes derived from the small-group interviews (N=8)**

| **Ranking** | **Attribute** | **MIS** |
| --- | --- | --- |
| 1 | Quality of life | 5.75 |
| 2 | Long-term diabetes complications | 5.50 |
| 3 | Short-term adverse medication events | 5.25 |
| 4 | Clinical outcomes | 4.38 |
| 5 | Lifestyle | 3.88 |
| 6 | Method of administering medication | 3.75 |
| 7 | Mental health | 3.38 |
|  | Medication withdrawal | 3.38 |
| 9 | Personal treatment control | 3.25 |
| 10 | Interaction with other medication | 3.13 |
| 11 | Alternatives to medication | 2.88 |
| 12 | Experiences of other individuals | 2.00 |
| 13 | Physical habituation to medication | 1.88 |
| 14 | Perseverance | 1.13 |
| 15 | Need for new medication | 0.88 |
| 16 | Frequency of medication intake | 0.75 |
|  | Home situation | 0.75 |
|  | Social environment | 0.75 |
| 19 | Social support | 0.00 |
|  | Out-of-pocket costs | 0.00 |
|  | Manufacturer of medication | 0.00 |

**Abbreviations**: MIS, mean importance score

**Table S3. Top ten attribute ranking for men (N=181) and women (N=104)**

|  | **Men (N=181)** | | | **Women (N=104)** | | |
| --- | --- | --- | --- | --- | --- | --- |
|  |  | **Attribute** | **RIS (95% CI)** |  | **Attribute** | **RIS (95% CI)** |
| 1 | ● | Quality of life | 11.90  (11.66, 12.13) | ● | Quality of life | 12.09  (11.74, 12.43) |
| 2 | ● | Clinical outcomes | 10.36  (10.06, 10.65) | ● | Clinical outcomes | 10.47  (10.07, 10.88) |
| 3 | ● | Long-term diabetes complications | 9.99  (9.61, 10.37) | ● | Long-term diabetes complications | 9.54  (8.92, 10.17) |
| 4 | ● | Short-term adverse medication events | 7.70  (7.26, 8.14) | ● | Short-term adverse medication events | 7.76  (7.19, 8.33) |
| 5 | ● | Lifestyle | 7.30  (6.78, 7.81) | ↑ | Interaction with other medication | 6.91  (6.23, 7.58) |
| 6 | ● | Interaction with other medication | 6.52  (5.99, 7.05) | ↓ | Lifestyle | 6.84  (6.18, 7.50) |
| 7 | ● | Personal treatment control | 6.50  (6.05, 6.95) | ● | Personal treatment control | 6.77  (6.14, 7.40) |
| 8 | ● | Medication withdrawal | 6.46  (5.90, 7.01) | ● | Medication withdrawal | 5.60  (4.87, 6.34) |
| 9 | ● | Mental health | 4.70  (4.18, 5.22) | ● | Mental health | 5.56  (4.85, 6.27) |
| 10 | ● | Perseverance | 4.13  (3.92, 4.35) | ● | Perseverance | 4.48  (4.16, 4.80) |

**Notes:**

● same position as overall attribute ranking

↑ increased in ranking compared with overall attribute ranking

↓ decreased in ranking compared with overall attribute ranking

**Table S4. Top ten attribute ranking for individuals aged 18-60 years (N=20), individuals aged 60-75 years (N=165) and individuals aged >75 years (N=75)**

|  | **Age 18-60 years (N=20)** | | | **Age 60-75 years (N=165)** | | | **Age >75 years (N=75)** | | |
| --- | --- | --- | --- | --- | --- | --- | --- | --- | --- |
|  |  | **Attribute** | **RIS (95% CI)** |  | **Attribute** | **RIS (95% CI)** |  | **Attribute** | **RIS (95% CI)** |
| 1 | ● | Quality of life | 11.64  (10.65, 12.63) | ● | Quality of life | 11.81  (11.56, 12.05) | ● | Quality of life | 12.30  (11.97, 12.63) |
| 2 | ● | Clinical outcomes | 9.35  (8.34, 10.36) | ● | Clinical outcomes | 10.55  (10.25, 10.84) | ● | Clinical outcomes | 10.37  (9.94, 10.79) |
| 3 | ● | Long-term diabetes complications | 8.84  (7.36, 10.31) | ● | Long-term diabetes complications | 9.74  (9.33, 10.15) | ● | Long-term diabetes complications | 10.17  (9.58, 10.76) |
| 4 | ↑ | Medication withdrawal | 8.39  (6.58, 10.20) | ● | Short-term adverse medication events | 8.00  (7.58, 8.42) | ● | Short-term adverse medication events | 7.38  (6.74, 8.03) |
| 5 | ● | Lifestyle | 7.35  (5.75, 8.95) | ● | Lifestyle | 7.10  (6.57, 7.64) | ● | Lifestyle | 7.13  (6.44, 7.82) |
| 6 | ↓ | Short-term adverse medication events | 7.14  (5.66, 8.63) | ↑ | Personal treatment control | 6.81  (6.32, 7.30) | ● | Interaction with other medication | 6.65  (5.93, 7.37) |
| 7 | ↓ | Interaction with other medication | 5.94  (4.17, 7.72) | ↓ | Interaction with other medication | 6.76  (6.22, 7.30) | ● | Personal treatment control | 6.48  (5.88, 7.07) |
| 8 | ↓ | Personal treatment control | 5.43  (3.93, 6.92) | ● | Medication withdrawal | 6.47  (5.88, 7.06) | ↑ | Mental health | 5.32  (4.59, 6.06) |
| 9 | ● | Mental health | 4.83  (3.12, 6.54) | ● | Mental health | 4.85  (4.31, 5.39) | ↓ | Medication withdrawal | 5.16  (4.48, 5.85) |
| 10 | ⁎ | Need for new medication | 4.27  (3.01, 5.53) | ⁎ | Alternatives to medication | 4.24  (3.75, 4.74) | ⁎ | Home situation | 4.59  (3.83, 5.34) |

**Notes:**

● same position as overall attribute ranking

↑ increased in ranking compared with overall attribute ranking

↓ decreased in ranking compared with overall attribute ranking

⁎ new in the top ten ranking

**Table S5. Top ten attribute ranking for individuals with underweight (N=4), individuals with a healthy weight (N=100), individuals with overweight (N=74) and individuals with obese (N=99)**

|  | **Underweight (N=4)** | | | **Healthy weight (N=100)** | | | **Overweight (N=74)** | | | **Obese (N=99)** | | |
| --- | --- | --- | --- | --- | --- | --- | --- | --- | --- | --- | --- | --- |
|  |  | **Attribute** | **RIS (95% CI)** |  | **Attribute** | **RIS (95% CI)** |  | **Attribute** | **RIS (95% CI)** |  | **Attribute** | **RIS (95% CI)** |
| 1 | ● | Quality of life | 12.44  (10.45, 14.44) | ● | Quality of life | 12.01  (11.67, 12.34) | ● | Quality of life | 12.17  (11.89, 12.44) | ● | Quality of life | 11.69  (11.30, 12.09) |
| 2 | ● | Clinical outcomes | 11.58  (9.93, 13.24) | ● | Clinical outcomes | 10.48  (10.06, 10.90) | ● | Clinical outcomes | 10.76  (10.41, 11.12) | ● | Clinical outcomes | 10.05  (9.63, 10.47) |
| 3 | ↑ | Personal treatment control | 8.18  (4.49, 11.88) | ● | Long-term diabetes complications | 9.80  (9.20, 10.40) | ● | Long-term diabetes complications | 9.94  (9.39, 10.50) | ● | Long-term diabetes complications | 10.00  (9.44, 10.56) |
| 4 | ↑ | Interaction with other medication | 7.77  (3.68, 11.85) | ● | Short-term adverse medication events | 8.12  (7.53, 8.71) | ● | Short-term adverse medication events | 7.83  (7.15, 8.50) | ● | Short-term adverse medication events | 7.36  (6.77, 7.95) |
| 5 | ↓ | Long-term diabetes complications | 7.75  (2.20, 13.30) | ↑ | Interaction with other medication | 7.11  (6.36, 7.86) | ● | Lifestyle | 7.26  (6.49, 8.03) | ● | Lifestyle | 7.35  (6.60, 8.10) |
| 6 | ↓ | Lifestyle | 7.03  (2.02, 12.04) | ↑ | Personal treatment control | 7.02  (6.44, 7.61) | ↑ | Medication withdrawal | 6.81  (5.90, 7.71) | ↑ | Personal treatment control | 6.48  (5.86, 7.10) |
| 7 | ↓ | Short-term adverse medication events | 7.03  (2.72, 11.34) | ↓ | Lifestyle | 6.89  (6.23, 7.55) | ↓ | Interaction with other medication | 6.65  (5.86, 7.44) | ↓ | Interaction with other medication | 6.13  (5.45, 6.82) |
| 8 | ● | Medication withdrawal | 6.34  (2.40, 10.27) | ● | Medication withdrawal | 5.79  (5.05, 6.52) | ↓ | Personal treatment control | 6.21  (5.45, 6.96) | ● | Medication withdrawal | 6.06  (5.30, 6.82) |
| 9 | ⁎ | Physical habituation to medication | 4.93  (0.30, 9.56) | ● | Mental health | 5.60  (4.87, 6.34) | ● | Mental health | 4.98  (4.18, 5.78) | ● | Mental health | 4.59  (3.87, 5.31) |
| 10 | ● | Perseverance | 4.37  (3.79, 4.96) | ● | Perseverance | 4.17  (3.86, 4.48) | ⁎ | Need for new medication | 4.13  (3.51, 4.76) | ● | Perseverance | 4.48  (4.17, 4.79) |

**Notes:**

● same position as overall attribute ranking

↑ increased in ranking compared with overall attribute ranking

↓ decreased in ranking compared with overall attribute ranking

⁎ new in the top ten ranking

**Table S6. Top ten attribute ranking for individuals with high education (N=93), individuals with middle education (N=145) and individuals with low education (N=40)**

|  | **High education**  **(N=93)** | | | **Middle education (N=145)** | | | **Low education**  **(N=40)** | | |
| --- | --- | --- | --- | --- | --- | --- | --- | --- | --- |
|  |  | **Attribute** | **RIS (95% CI)** |  | **Attribute** | **RIS (95% CI)** |  | **Attribute** | **RIS (95% CI)** |
| 1 | ● | Quality of life | 11.79  (11.47, 12.12) | ● | Quality of life | 12.05  (11.77, 12.33) | ● | Quality of life | 12.11  (11.56, 12.66) |
| 2 | ● | Clinical outcomes | 10.62  (10.24, 10.99) | ● | Clinical outcomes | 10.37  (10.01, 10.72) | ● | Clinical outcomes | 10.00  (9.30, 10.69) |
| 3 | ● | Long-term diabetes complications | 9.99  (9.43, 10.55) | ● | Long-term diabetes complications | 9.81  (9.33, 10.28) | ● | Long-term diabetes complications | 9.51  (8.53, 10.49) |
| 4 | ● | Short-term adverse medication events | 7.74  (7.19, 8.29) | ● | Short-term adverse medication events | 7.86  (7.35, 8.37) | ● | Short-term adverse medication events | 7.06  (6.09, 8.02) |
| 5 | ● | Lifestyle | 7.74  (7.08, 8.41) | ↑ | Interaction with other medication | 6.92  (6.33, 7.51) | ● | Lifestyle | 7.04  (5.87, 8.21) |
| 6 | ↑ | Personal treatment control | 7.37  (6.75, 7.99) | ↓ | Lifestyle | 6.80  (6.22, 7.38) | ↑ | Personal treatment control | 6.23  (5.17, 7.28) |
| 7 | ↑ | Medication withdrawal | 6.80  (6.05, 7.65) | ● | Personal treatment control | 6.15  (5.65, 6.66) | ↓ | Interaction with other medication | 5.88  (4.79, 6.96) |
| 8 | ↓ | Interaction with other medication | 6.47  (5.72, 7.22) | ● | Medication withdrawal | 5.90  (5.26, 6.54) | ● | Medication withdrawal | 5.63  (4.49, 6.77) |
| 9 | ● | Mental health | 4.95  (4.21, 5.69) | ● | Mental health | 5.18  (4.59, 5.77) | ⁎ | Home situation | 5.26  (4.06, 6.45) |
| 10 | ⁎ | Alternatives to medication | 4.46  (3.81, 5.11) | ● | Perseverance | 4.21  (4.00, 4.41) | ● | Perseverance | 4.95  (4.39, 5.52) |

**Notes:**

● same position as overall attribute ranking

↑ increased in ranking compared with overall attribute ranking

↓ decreased in ranking compared with overall attribute ranking

⁎ new in the top ten ranking

**Table S7. Top ten attribute ranking for individuals who take metformin without sulfonylurea (N=129), who take metformin with sulfonylurea (N=43) and individuals who use insulin (N=81)**

|  | **No Medication (N=22)** | | | **Metformin without SU (N=129)** | | | **Metformin with SU (N=43)** | | | **Insulin (N=81)** | | |
| --- | --- | --- | --- | --- | --- | --- | --- | --- | --- | --- | --- | --- |
|  |  | **Attribute** | **RIS (95%CI)** |  | **Attribute** | **RIS (95%CI)** |  | **Attribute** | **RIS (95% CI)** |  | **Attribute** | **RIS (95%CI)** |
| 1 | ● | Quality of life | 12.06 (11.59, 12.54) | ● | Quality of life | 11.90  (11.60, 12.21) | ● | Quality of life | 12.09  (11.61, 12.57) | ● | Quality of life | 11.78  (11.39, 12.17) |
| 2 | ↑ | Lifestyle | 10.19 (9.40, 10.98) | ● | Clinical outcomes | 10.52  (10.14, 10.89) | ● | Clinical outcomes | 10.65  (10.08, 11.22) | ● | Clinical outcomes | 10.39  (9.97, 10.82) |
| 3 | ● | Long-term diabetes complications | 9.78 (8.50-11.07) | ● | Long-term diabetes complications | 9.82  (9.35, 10.29) | ● | Long-term diabetes complications | 9.68  (8.73, 10.62) | ● | Long-term diabetes complications | 10.07  (9.45, 10.69) |
| 4 | ↓ | Clinical outcomes | 9.33 (8.43, 10.24) | ● | Short-term adverse medication events | 7.86  (7.33, 8.40) | ● | Short-term adverse medication events | 7.92  (7.11, 8.73) | ● | Short-term adverse medication events | 7.92  (7.26, 8.59) |
| 5 | ↑ | Personal treatment control | 7.67 (6.17,9.17) | ↑ | Interaction with other medication | 7.00  (6.36, 7.63) | ● | Lifestyle | 7.61  (6.59, 8.63) | ↑ | Personal treatment control | 7.20  (6.56, 7.84) |
| 6 | ↑ | Medication withdrawal | 6.53 (5.13, 7.93) | ↓ | Lifestyle | 6.80  (6.21, 7.39) | ↑ | Medication withdrawal | 7.02  (5.59, 8.45) | ● | Interaction with other medication | 6.70  (5.86, 7.55) |
| 7 | ↓ | Short-term adverse medication events | 6.46 (5.31, 7.61) | ● | Personal treatment control | 6.33  (5.77, 6.90) | ↓ | Interaction with other medication | 5.90  (4.93, 6.88) | ↓ | Lifestyle | 6.64  (5.84, 7.44) |
| 8 | ↑ | Mental health | 6.06 (4.52, 7.61) | ● | Medication withdrawal | 5.82  (5.20, 6.44) | ↓ | Personal treatment control | 5.68  (4.75, 6.61) | ● | Medication withdrawal | 6.09  (5.23, 6.94) |
| 9 | ↓ | Interaction with other medication | 5.82 (4.63,7.00) | ● | Mental health | 4.75  (4.14, 5.35) | ● | Mental health | 5.74  (4.60, 6.87) | ● | Mental health | 4.42  (3.67, 5.17) |
| 10 | ↑ | Alternatives ftoor medication | 5.69 (4.20, 7.18) | ● | Perseverance | 4.19  (3.92, 4.45) | ⁎ | Home situation | 4.28  (3.07, 5.49) | ● | Perseverance | 4.35  (3.43, 4.55) |

**Notes**:

● same position as overall attribute ranking

↑ increased in ranking compared with overall attribute ranking

↓ decreased in ranking compared with overall attribute ranking

⁎ new in the top ten ranking

**Abbreviations**: SU, sulfonylurea

**Table S8. Top ten attribute ranking for individuals with a duration of diabetes 0-5 years (N=42), individuals with a duration of diabetes 6-10 years (N=70), individuals with a duration of diabetes 11-20 years (N=122) and duration of diabetes >20 years (N=49)**

|  | **Duration of diabetes 0-5 years**  **(N=42)** | | | **Duration of diabetes 6-10 years (N=70)** | | | **Duration of diabetes 11-20 years (N=122)** | | | **Duration of diabetes >20 years (N=49)** | | |
| --- | --- | --- | --- | --- | --- | --- | --- | --- | --- | --- | --- | --- |
|  |  | **Attribute** | **RIS (95% CI)** |  | **Attribute** | **RIS (95% CI)** |  | **Attribute** | **RIS (95% CI)** |  | **Attribute** | **RIS (95% CI)** |
| 1 | ● | Quality of life | 11.76  (11.24, 12.29) | ● | Quality of life | 12.17  (11.84, 12.51) | ● | Quality of life | 12.06  (11.76, 12.36) | ● | Quality of life | 11.56  (10.99, 12.13) |
| 2 | ● | Clinical outcomes | 10.08  (9.42, 10.75) | ● | Clinical outcomes | 10.28  (9.85, 10.72) | ● | Clinical outcomes | 10.55  (10.21, 10.88) | ● | Clinical outcomes | 10.37  (9.62, 11.11) |
| 3 | ● | Long-term diabetes complications | 9.95  (9.10, 10.80) | ● | Long-term diabetes complications | 9.37  (8.70, 10.03) | ● | Long-term diabetes complications | 9.85  (9.31, 10.39) | ● | Long-term diabetes complications | 10.24  (9.54, 10.95) |
| 4 | ● | Short-term adverse medication events | 7.41  (6.39, 8.43) | ↑ | Lifestyle | 7.82  (7.00, 8.63) | ● | Short-term adverse medication events | 7.81  (7.31, 8.31) | ● | Short-term adverse medication events | 8.29  (7.43, 9.16) |
| 5 | ● | Lifestyle | 7.36  (6.27, 8.44) | ↓ | Short-term adverse medication events | 7.31  (6.58, 8.04) | ● | Lifestyle | 6.99  (6.38, 7.61) | ↑ | Interaction with other medication | 7.01  (5.99, 8.04) |
| 6 | ↑ | Personal treatment control | 7.31  (6.27, 8.34) | ↑ | Personal treatment control | 6.47  (5.69, 7.25) | ● | Interaction with other medication | 6.72  (6.08, 7.36) | ↑ | Personal treatment control | 6.96  (6.08, 7.83) |
| 7 | ↓ | Interaction with other medication | 7.27  (6.15, 8.38) | ↑ | Medication withdrawal | 6.41  (5.49, 7.33) | ● | Personal treatment control | 6.34  (5.81, 6.88) | ↓ | Lifestyle | 6.37  (5.34, 7.39) |
| 8 | ● | Medication withdrawal | 5.94  (4.72, 7.16) | ↓ | Interaction with other medication | 5.87  (5.05, 6.69) | ● | Medication withdrawal | 6.16  (5.46, 6.86) | ● | Medication withdrawal | 5.96  (4.94, 6.98) |
| 9 | ● | Mental health | 5.27  (4.07, 6.48) | ● | Mental health | 5.05  (4.22, 5.89) | ● | Mental health | 5.02  (4.35, 5.68) | ● | Mental health | 4.82  (3.85, 5.79) |
| 10 | ● | Perseverance | 4.42  (3.91, 4.94) | ● | Perseverance | 4.43  (4.03, 4.82) | ● | Perseverance | 4.23  (3.95, 4.51) | ⁎ | Physical habituation to medication | 4.28  (3.61, 4.94) |

**Notes**:

● same position as overall attribute ranking

↑ increased in ranking compared with overall attribute ranking

↓ decreased in ranking compared with overall attribute ranking

⁎ new in the top ten ranking

**Table S9. Top ten attribute ranking for individuals with a HbA1c value <53 mmol/mol (<7.0%) (N=54), individuals with a HbA1c value between 53-64 mmol/mol (7.0-8.0%) (N=95), individuals with a HbA1c value > 64 mmol/mol (>8.0%) (N=26) and individuals who do not know their HbA1c value (N=106)**

|  | **HbA1c < 53 mmol/mol (<7.0%) (N=54)** | | | **HbA1c 53-64 mmol/mol (7.0-8.0%) (N=95)** | | | **HbA1c > 64 mmol/mol (>8.0%) (N=26)** | | | **Do not know**  **(N=106)** | | |
| --- | --- | --- | --- | --- | --- | --- | --- | --- | --- | --- | --- | --- |
|  |  | **Attribute** | **RIS (95% CI)** |  | **Attribute** | **RIS (95% CI)** |  | **Attribute** | **RIS (95% CI)** |  | **Attribute** | **RIS (95% CI)** |
| 1 | ● | Quality of life | 11.96  (11.56, 12.37) | ● | Quality of life | 12.08  (11.75, 12.40) | ● | Quality of life | 11.86  (11.29, 12.43) | ● | Quality of life | 11.88  (11.51, 12.24) |
| 2 | ● | Clinical outcomes | 10.61  (10.08, 11.15) | ● | Clinical outcomes | 10.35  (9.95, 10.74) | ↑ | Long-term diabetes complications | 10.37  (9.40, 11.34) | ● | Clinical outcomes | 10.58  (10.20, 10.96) |
| 3 | ● | Long-term diabetes complications | 9.58  (8.83, 10.33) | ● | Long-term diabetes complications | 9.99  (9.36, 10.63) | ↓ | Clinical outcomes | 9.39  (8.32, 10.46) | ● | Long-term diabetes complications | 9.72  (9.19, 10.24) |
| 4 | ↑ | Lifestyle | 8.01  (7.06, 8.97) | ● | Short-term adverse medication events | 7.64  (7.03, 8.25) | ● | Short-term adverse medication events | 8.52  (7.33, 9.70) | ● | Short-term adverse medication events | 7.70  (7.12, 8.29) |
| 5 | ↓ | Short-term adverse medication events | 7.62  (6.86, 8.38) | ● | Lifestyle | 7.33  (6.66, 8.00) | ↑ | Personal treatment control | 6.94  (5.77, 8.12) | ↑ | Interaction with other medication | 6.98  (6.33, 7.63) |
| 6 | ↑ | Personal treatment control | 7.09  (6.24, 7.94) | ↑ | Medication withdrawal | 6.60  (5.77, 7.44) | ↓ | Lifestyle | 6.71  (4.97, 8.45) | ↓ | Lifestyle | 6.53  (5.90, 7.17) |
| 7 | ↑ | Medication withdrawal | 6.73  (5.77, 7.68) | ● | Personal treatment control | 6.37  (5.74, 7.01) | ↓ | Interaction with other medication | 6.56  (5.10, 8.02) | ● | Personal treatment control | 6.45  (5.84, 7.06) |
| 8 | ↓ | Interaction with other medication | 6.66  (5.71, 7.62) | ↓ | Interaction with other medication | 6.32  (5.55, 7.09) | ● | Medication withdrawal | 5.40  (4.02, 6.79) | ● | Medication withdrawal | 5.60  (4.87, 6.32) |
| 9 | ⁎ | Alternatives to medication | 5.03  (4.09, 5.97) | ● | Mental health | 4.86  (4.17, 5.54) | ⁎ | Home situation | 4.60  (3.03, 6.17) | ● | Mental health | 5.49  (4.75, 6.23) |
| 10 | ↓ | Mental health | 4.89  (3.89, 5.89) | ● | Perseverance | 4.14  (3.83, 4.45) | ● | Perseverance | 4.28  (3.62, 4.95) | ● | Perseverance | 4.40  (4.10, 4.71) |

**Notes**:

● same position as overall attribute ranking

↑ increased in ranking compared with overall attribute ranking

↓ decreased in ranking compared with overall attribute ranking

⁎ new in the top ten ranking

**Table S10. Model fit and diagnostic indicators for models with increasing numbers of latent classes**

|  | Model fit indicators | | |
| --- | --- | --- | --- |
| Models | AIC | BIC |  |
| 1-class | 26272.63 | 26426.03 |  |
| 2-class | 25469.85 | 25703.61 |  |
| 3-class | 25143.10 | 25457.21 |  |
| 4-class | **24921.22** | **25315.67** |  |
|  |  |  |  |
|  | Diagnostic indicators | | |
| Models | Smallest class size (%) | Entropy | VLMR, LRT |
| 1-class | 100 | n/a | n/a |
| 2-class | **23** | **0.933** | 0.031 |
| 3-class | 4 | **0.952** | 0.434 |
| 4-class | 4 | **0.901** | 0.752 |

**Notes**: N=285. Bold text indicates the model met the fit criteria.

**Abbreviations**: AIC, Akaike Information Criterion; BIC, Bayesian Information Criterion; VLMR-LRT, Vuong-Lo-Mendell-Rubin adjusted likelihood ratio test.

**Table S11. Characteristics of the individuals with Type 2 diabetes for each identified class using latent class analysis**

| **Characteristic** |  | **Class 1 (N=65)** | **Class 2 (N=220)** |
| --- | --- | --- | --- |
| Sex, N (%) | Men | 40 (62) | 141 (64) |
| Women | 25 (38) | 79 (36) |
| Age, mean ± SD (years) |  | 74 (±9) | 71 (±8) |
| BMI (kg/m2), N (%) | Underweight  Healthy weight  Overweight  Obese | 0 (0)  23 (35)  13 (20)  26 (40) | 4 (2)  77 (35)  61 (28)  73 (33) |
| Educational level, N (%) | Low | 15 (23) | 25 (11) |
| Middle | 34 (52) | 111 (50) |
| High | 15 (23) | 78 (35) |
| Occupation, N (%) | Paid job | 9 (14) | 49 (22) |
|  | Unemployed/looking for a job | 3 (5) | 7 (3) |
|  | Incapacitated | 3 (5) | 20 (9) |
|  | Housewife/houseman | 3 (5) | 14 (6) |
|  | Retired | 50 (77) | 136 (62) |
|  | Other | 3 (5) | 8 (4) |
| Duration of diabetes, median (IQR)(years) |  | 11 (7, 16) | 15 (10, 20) |
| Medication, N (%) | No medication | 8 (12) | 14 (6) |
| Metformin  Metformin + SU | 28 (43)  12 (19) | 101 (46)  31 (14) |
| Insulin | 15 (23) | 66 (30) |
| Other | 2 (3) | 8 (4) |
| HbA1c value, N (%) | <53 mmol/mol (<7.0%) | 9 (14) | 45 (20) |
| 53-64 mmol/mol (7.0-8.0%) | 23 (35) | 72 (33) |
| >64 mmol/mol (>8.0%) | 8 (12) | 18 (8) |
| Do not know | 25 (38) | 81 (37) |

**Abbreviations**: SD, standard deviation; BMI, body mass index; IQR, interquartile range; SU, sulfonylurea

**References**

1. Chew LD, Bradley KA, Boyko EJ. Brief questions to identify patients with inadequate health literacy. *Fam Med.* 2004;36(8):588-594.

2. Tavakol M, Dennick R. Making sense of Cronbach's alpha. *Int J Med Educ.* 2011;2:53-55.

3. *RStudio: Integrated Development for R* [computer program]. Version 1.4.1106. Boston, MA: RStudio, PBC; 2020.

4. Voedingscentrum. BMI berekenen. https://www.voedingscentrum.nl/nl/bmi-meter?gclid=CjwKCAiAtouOBhA6EiwA2nLKH9J7PimDubz0qBWnTgmt0fhV0TulVRwcXnp1LSQxU4gES499GQ70FxoCdoMQAvD_BwE. Accessed.

5. Carlin JB, Doyle LW. Comparison of means and proportions using confidence intervals. *J Paediatr Child Health.* 2001;37(6):583-586.

6. Weller BE, Bowen NK, Faubert SJ. Latent Class Analysis: A Guide to Best Practice. *J Black Psychol.* 2020;46(4):287-311.

7. Yan S, Kwan YH, Tan CS, Thumboo J, Low LL. A systematic review of the clinical application of data-driven population segmentation analysis. *BMC Med Res Methodol.* 2018;18(1):121.

8. Muthén LK, Muthén BO. *Mplus User’s Guide.* Eighth Edition ed. Los Angeles, CA: Muthén & Muthén; (1998-2017).
